# Supplementary material
Source: PubMed Central journal article supplement (PMC8092523)
Supplement: AAC.01833-20-s0001.pdf [file AAC.01833-20-s0001.pdf]

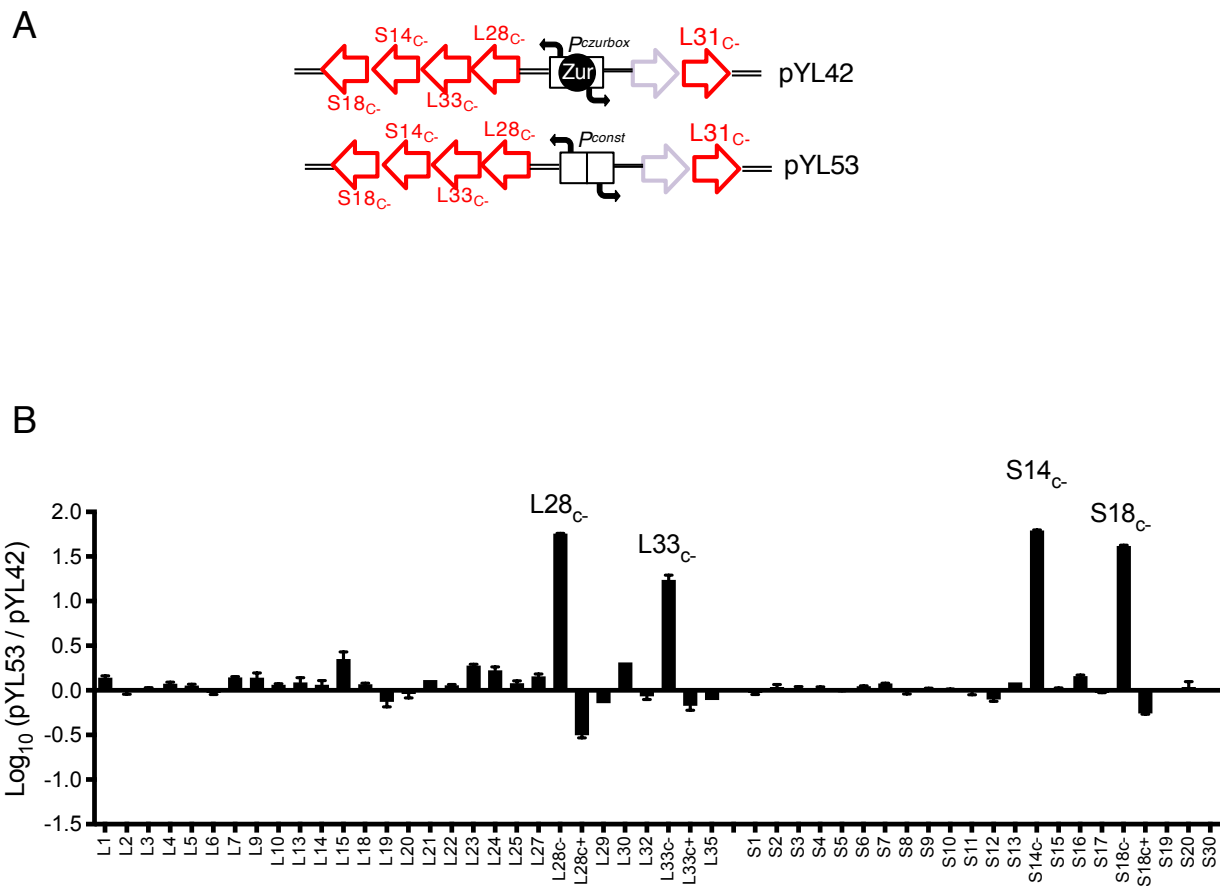

**Figure S1.** Incorporation of C- r-proteins in 70S ribosomes purified from high-zinc cultures of recombinant *M. smegmatis* cells constitutively expressing *c*- operon. **A.** Schematic representation of wild-type *c*- operon expressed by native (*Pzurbox*) promoter on pYL42 plasmid or an engineered constitutive promoter *Pconst* on pYL53 plasmid. **B.** Relative abundance of each of the ribosomal protein in 70S ribosomes purified from high-zinc culture of *mc*<sup>2</sup>-155:Δ*c*- strains transformed with either pYL42 or pYL53 plasmid.

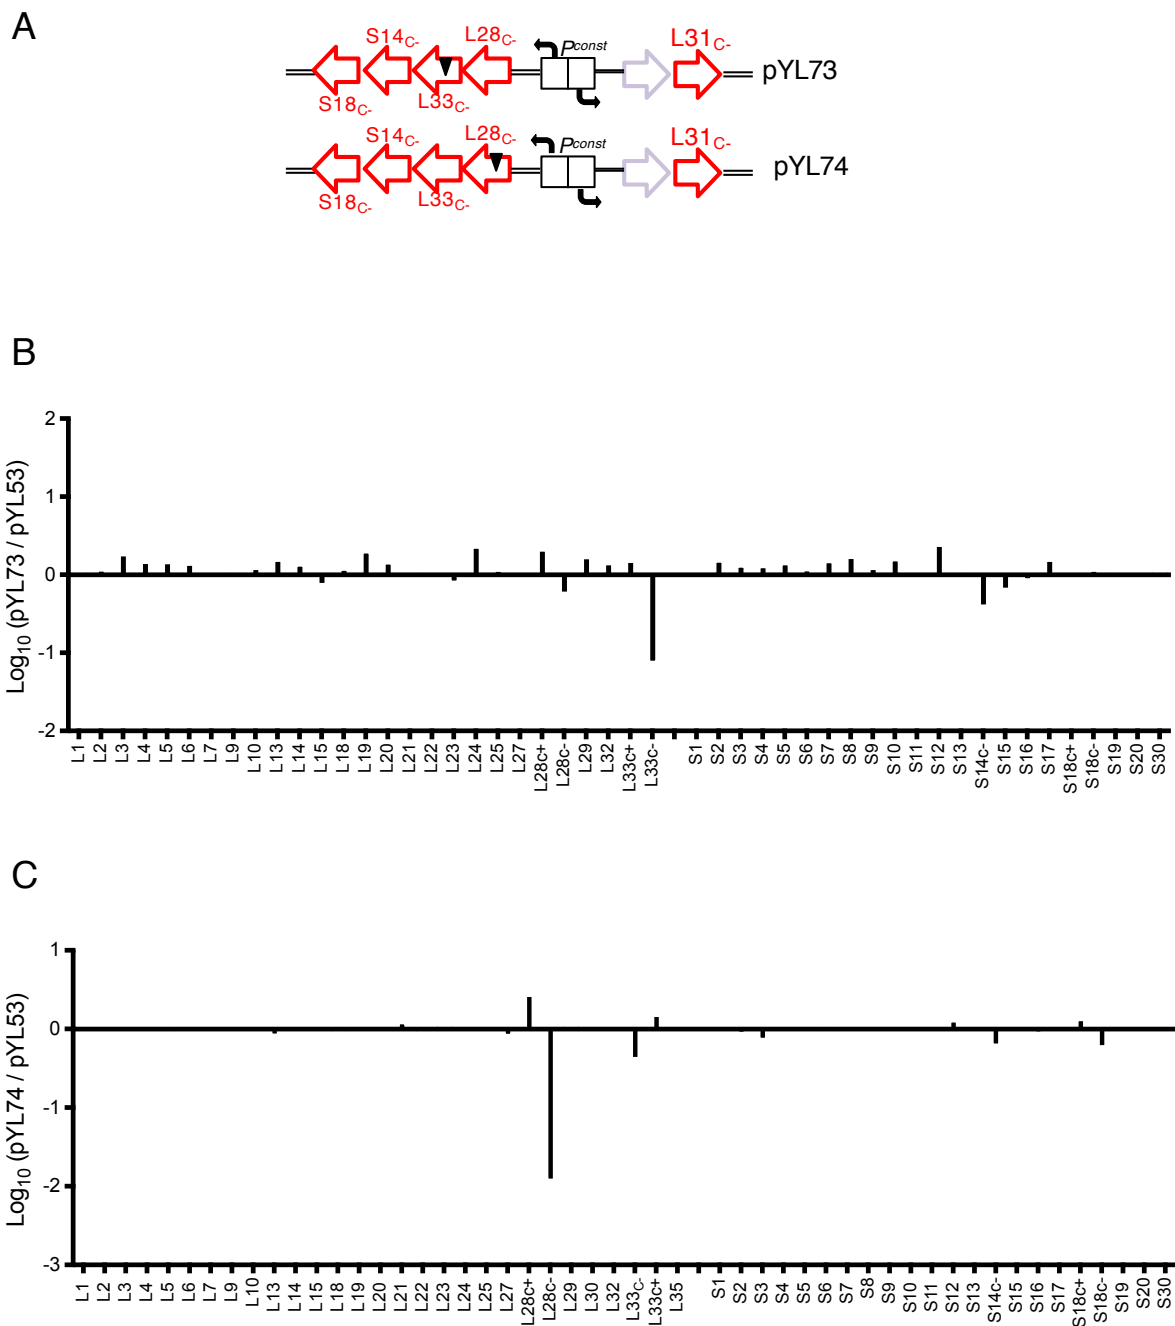

**Figure S2.** iTRAQ-MS based confirmation of protein composition of ribosomes from mutant strains (described in figure 3A) carrying in-frame deletion in L33c- (on pYL73 plasmid) and L28c- (on pYL74 plasmid) of the *c*- operon of *M. smegmatis*. It is to be noted that ribosomes from S14c- and S18c- deletion strains were confirmed previously (8). **A.** Schematic representation of the *c*- operon carrying in-frame deletion in L28c- (pYL74) and L33c- (pYL73) expressed from the  $P_{const}$  promoter. **B-C.** Relative abundance of each of the ribosomal protein in 70S ribosomes purified from high-zinc culture of  $mc^2155:\Delta c$ - strain transformed with either pYL73 or pYL74 plasmids. Ribosomes purified from high-zinc culture of  $mc^2155:\Delta c$ - strain transformed with pYL53 were used as reference.

12 **Table S1:** List of plasmids and strains used in this study

13

14

| Plasmid                       | Remarks                                                                                                                                                   | Reference  |
|-------------------------------|-----------------------------------------------------------------------------------------------------------------------------------------------------------|------------|
| pMH94                         | L5-attP-based integrative vector for mycobacteria; <i>kan<sup>r</sup></i>                                                                                 | (1)        |
| pYUB854                       | Cosmid vector, <i>hyg<sup>r</sup></i>                                                                                                                     | (1)        |
| pJV53-SacB                    | Sucrose-sensitive marker SacB cloned in pJV53 @ SpeI site; <i>kan<sup>r</sup></i>                                                                         | (1)        |
| pYL3                          | <i>kan<sup>r</sup></i> cassette in pMH94 @ EcoRV & NotI sites is replaced by <i>hyg<sup>r</sup></i> cassette from pYUB854; <i>hyg<sup>r</sup></i>         | (1)        |
| pYL42                         | <i>MSMEG_6065-6070</i> including P <sup>zur</sup> -box cloned in pYL3 @ SacI & XbaI; <i>hyg<sup>r</sup></i>                                               | (1)        |
| pYL53                         | <i>MSMEG_6065-6070</i> with zur box mutation in P <sup>zur</sup> -box region (P <sup>const</sup> ) cloned in pYL3 @ SacI+XbaI, <i>hyg<sup>r</sup></i>     | (1)        |
| pYL60                         | P <sup>const</sup> fused to <i>Rv2058-2055</i> ORF in pYL3 backbone @ SacI & XbaI; <i>hyg<sup>r</sup></i>                                                 | This study |
| pYL71                         | pYL53 with <i>Msmeg_6065</i> internal deletion (ΔS18c-) @ SacI & XbaI, <i>hyg<sup>r</sup></i>                                                             | (1)        |
| pYL72                         | pYL53 with <i>Msmeg_6066</i> internal deletion (ΔS14c-) @ SacI & XbaI, <i>hyg<sup>r</sup></i>                                                             | (1)        |
| pYL73                         | pYL53 with <i>Msmeg_6067</i> internal deletion (ΔL33c-) @ SacI & XbaI, <i>hyg<sup>r</sup></i>                                                             | This study |
| pYL74                         | pYL53 with <i>Msmeg_6068</i> internal deletion (ΔL28c-) @ SacI & XbaI, <i>hyg<sup>r</sup></i>                                                             | This study |
| pYL76                         | pYL53 with <i>Msmeg_6070</i> internal deletion (ΔL31c-) @ SacI & XbaI, <i>hyg<sup>r</sup></i>                                                             | This study |
| pYL97                         | <i>Rv2055c-2058c</i> with <i>Rv2056c</i> internal deletion (ΔS14c-) including P <sup>zur</sup> -box cloned in pYL3 @ EcoRI & XbaI; <i>hyg<sup>r</sup></i> | This study |
| pYL230                        | pYL53 with S14c- (D67A), <i>hyg<sup>r</sup></i>                                                                                                           | This study |
| pYL232                        | pYL53 with S14c-(Δins), <i>hyg<sup>r</sup></i>                                                                                                            | This study |
| pYL233                        | pYL53 with S14c- (R83A), <i>hyg<sup>r</sup></i>                                                                                                           | This study |
|                               |                                                                                                                                                           |            |
| Strain                        | Remarks                                                                                                                                                   | Reference  |
| <i>mc<sup>2</sup>155</i>      | high-frequency transformation strain of <i>M. smegmatis</i> as wild-type                                                                                  | (1)        |
| <i>mc<sup>2</sup>155:Δmpy</i> | Δ <i>Msmeg_1878</i> in <i>mc<sup>2</sup>155</i> , <i>zeo<sup>r</sup></i>                                                                                  | (1)        |
| <i>mc<sup>2</sup>155:Δc-</i>  | Unmarked Δ <i>Msmeg_6065-6070</i> in <i>mc<sup>2</sup>155</i>                                                                                             | (1)        |
| <i>mc<sup>2</sup>7000</i>     | <i>M. tuberculosis</i> H37Rv:Δ <i>RD1:ΔpanCD</i> as wild-type                                                                                             | (2)        |
| <i>mc<sup>2</sup>7000:Δc-</i> | Unmarked Δ <i>Rv_2055c-2058c</i> in <i>mc<sup>2</sup>7000</i>                                                                                             | This study |

15

16

17

18 **Table S2:** List of primers used in this study.

| Primer Name       | Sequence                                | Used in:                                          |
|-------------------|-----------------------------------------|---------------------------------------------------|
| Pmsc--SacIF       | CTGCTCCAGCCAGAGCTCGGTGTCCACGCATGTCCAC   | pYL60                                             |
| Pmsc--R           | TGACTCTCCTTCGTGCGGTACCG                 |                                                   |
| Rv2058F           | CACGACGAAGGAGAGTCATTGTCCGCCCACTGCCAA    |                                                   |
| Rv2055XR          | CGGCTTGCCGGATCTAGATCATGGGCACAGTGCAGC    |                                                   |
| 6065Up200SF       | AACCACCGACCA GAGCTCGAT CGAGCGCCGCGCCGC  | pYL73, pYL74, pYL76,<br>pYL230, pYL232,<br>pYL233 |
| 6070Dn200XR       | ATCGTCACGCACGGTGCACGAGACGCATCCGTGCAC    |                                                   |
| 6067-delete-R     | CGCGAGGAACGCTGATGGCGAAGAAGTCGAAGATTG    | pYL73                                             |
| 6067-delete-F     | CCATCAGCGTTCCTCGCGCTCGTTGCGAGCCATCAG    | pYL74                                             |
| 6068-delete-R     | CGGGGGGAGAAGGTCTGATGGCTCGCAACGAGATCC    |                                                   |
| 6068-delete-F     | TCAGACCTTCTCCCCCGGCAGTGGGCCGACATTGA     |                                                   |
| 6070-delete-R     | GATGCCGGGTTTCACGATTGCTCTCCTGTCTGGGGG    | pYL76                                             |
| 6070-delete-F     | ATCGTGAAACCCGGCATCTGACGGTCCACCTTAGGG    |                                                   |
| Pmtbc--EF         | CATTGGGGTCGTGAATTCCGTGTTTCGTTGGGCGCGT   | pYL97                                             |
| pRv2055-2058XR    | TCGCCTGGTGAGTCTAGAGTACGACTTCGACTCCCC    |                                                   |
| Rv2056-F          | GACGTG GCCAAGAAGTCCGTCCGGAAGGCCAGCTGG   |                                                   |
| Rv2056-R          | GGAATTCTTGGCCACGTCAGCGTTCTCGCGAAAGT     |                                                   |
| p6066-D67A-R      | AACCGCGATGTCGTGCGCCGGCCGACCACGCGGG      | pYL230                                            |
| p6066-D67A-F      | CCCGCGTGGTTCGCGCCGGCGACGACATCGCGGTT     |                                                   |
| p6066DelR14toR53F | CCGCTGCTCGTTCTTGACAATCTTC               | pYL232                                            |
| p6066DelR14toR53R | AAGAACGAGCAGCGGGACTCCAGTCCCGTG          |                                                   |
| p6066-R83A-R      | TTCGGGTTGTCCCGTGTGGCCGTGCGCGAGATGGCGCAT | pYL233                                            |
| p6066-R83A-F      | ATGCGCCATCTCGCGCACGGCCACACGGGACAACCCGAA |                                                   |

19

20

21

22

1 **References**

- 2 1. **Li Y, Sharma MR, Koripella RK, Yang Y, Kaushal PS, Lin Q, Wade JT, Gray TA, Derbyshire**  
3 **KM, Agrawal RK, Ojha AK.** 2018. Zinc depletion induces ribosome hibernation in  
4 mycobacteria. *Proc Natl Acad Sci U S A* **115**:8191-8196.
- 5 2. **Sambandamurthy VK, Derrick SC, Hsu T, Chen B, Larsen MH, Jalapathy KV, Chen M, Kim**  
6 **J, Porcelli SA, Chan J, Morris SL, Jacobs WR, Jr.** 2006. Mycobacterium tuberculosis  
7 DeltaRD1 DeltapanCD: a safe and limited replicating mutant strain that protects  
8 immunocompetent and immunocompromised mice against experimental tuberculosis.  
9 *Vaccine* **24**:6309-6320.

10

11
